# Supplementary material
Source: PubMed Central journal article supplement (PMC4011420)
Supplement: Supp_Fig1.pdf [file Supp_Fig1.pdf]

## Supplementary Data

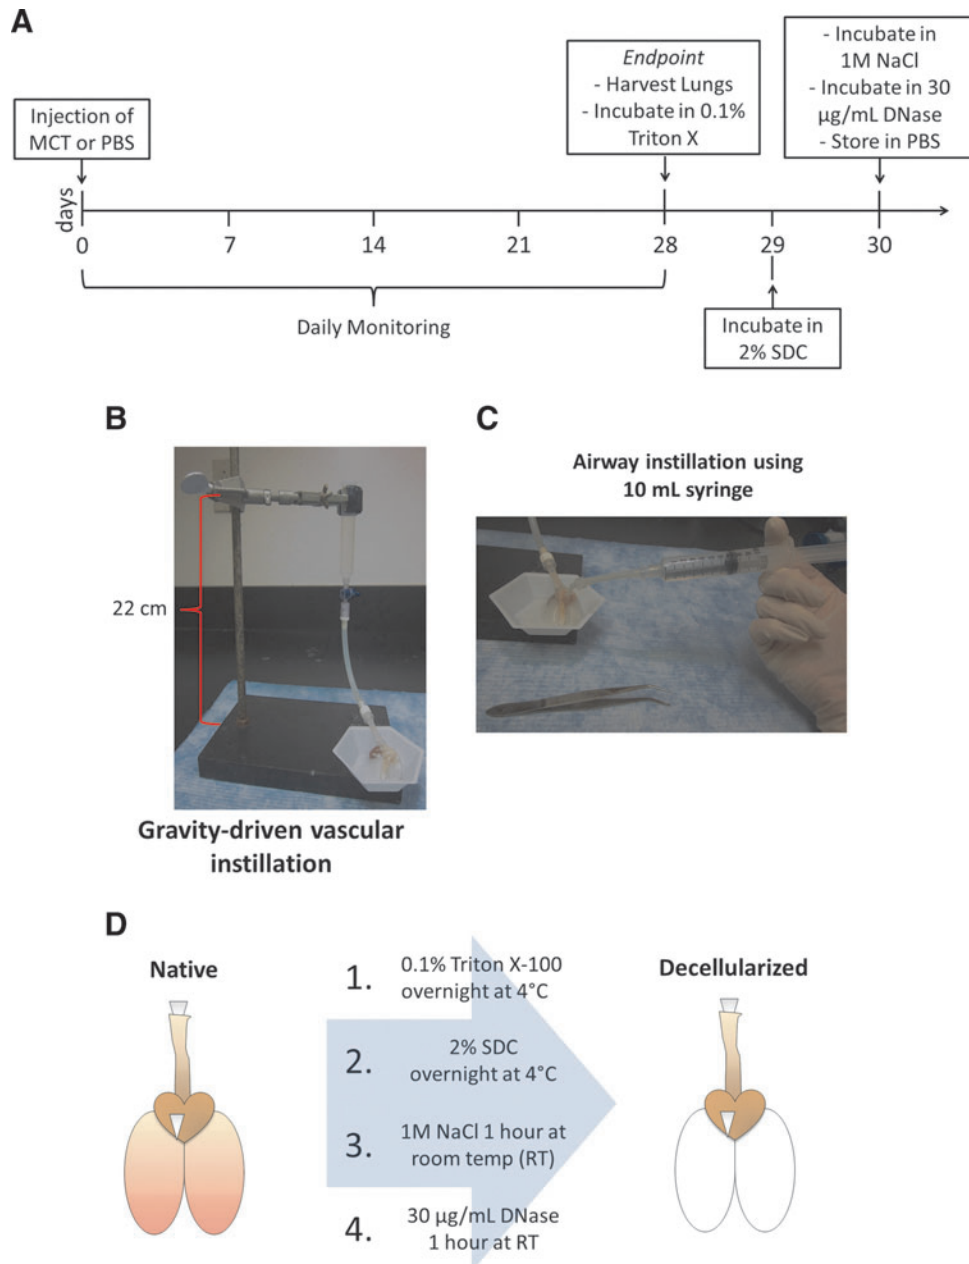

**SUPPLEMENTARY FIG. S1.** Experimental design for the induction of pulmonary hypertension (PHT) in rats and subsequent decellularization of lungs. **(A)** To investigate the application of decellularization in diseased lungs, monocrotaline (MCT) was used to induce PHT in male Sprague-Dawley rats via a one-time subcutaneous injection at a dosage of 60 mg/kg. Four weeks later, rats were killed and their lungs were removed and decellularized by instillation of solutions into the vasculature **(B)** by gravity or airspace **(C)** using a 10-mL syringe. **(D)** 0.1% Triton X-100 was instilled, and the lungs were incubated overnight at 4°C followed by instillation of 2% sodium deoxycholate and incubation at 4°C. Lungs were then instilled and incubated in 1 M NaCl for 1 h at room temperature followed by instillation and incubation in 30  $\mu\text{g/mL}$  bovine pancreatic DNase for 1 h and room temperature.
