# Supplementary material
Source: PubMed Central journal article supplement (PMC4011420)
Supplement: Supp_Fig2.pdf [file Supp_Fig2.pdf]

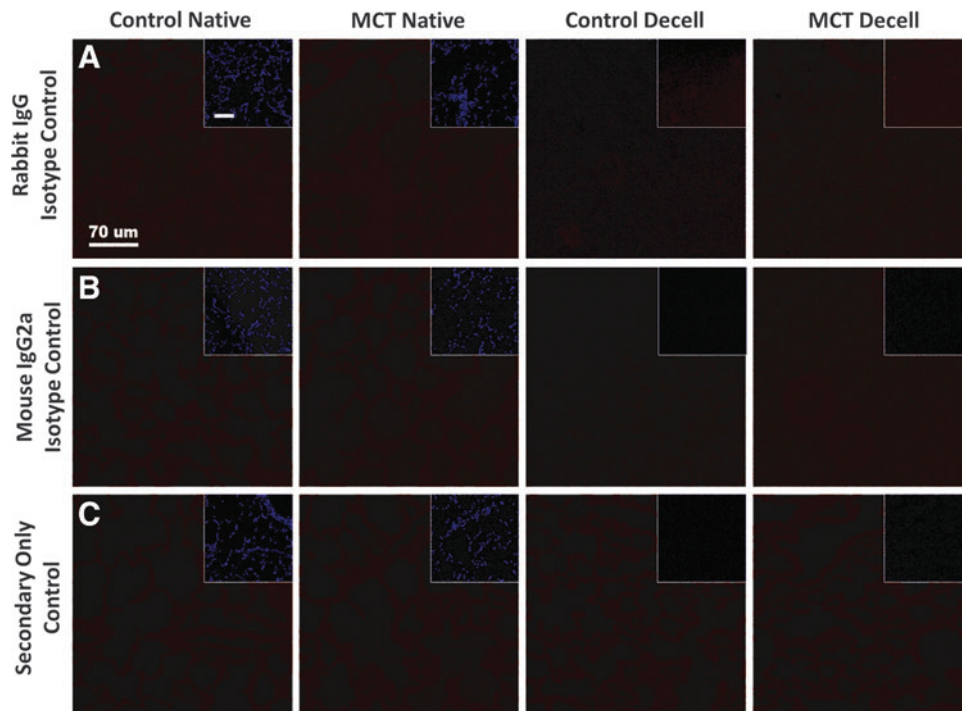

**SUPPLEMENTARY FIG. S2.** Isotype and secondary-only antibody controls for fluorescent immunohistochemistry. Staining of native and decellularized lung tissue section with rabbit isotype control primary antibody (A), mouse immunoglobulin G (IgG)2A isotype control (B), or secondary antibody only (C) suggest that extracellular matrix (ECM) antibody staining was specific for the indicated target. Scale bars represent 70  $\mu\text{m}$ . Insets show DAPI staining.
