# Supplementary material
Source: PubMed Central journal article supplement (PMC4011420)
Supplement: Supp_Fig3.pdf [file Supp_Fig3.pdf]

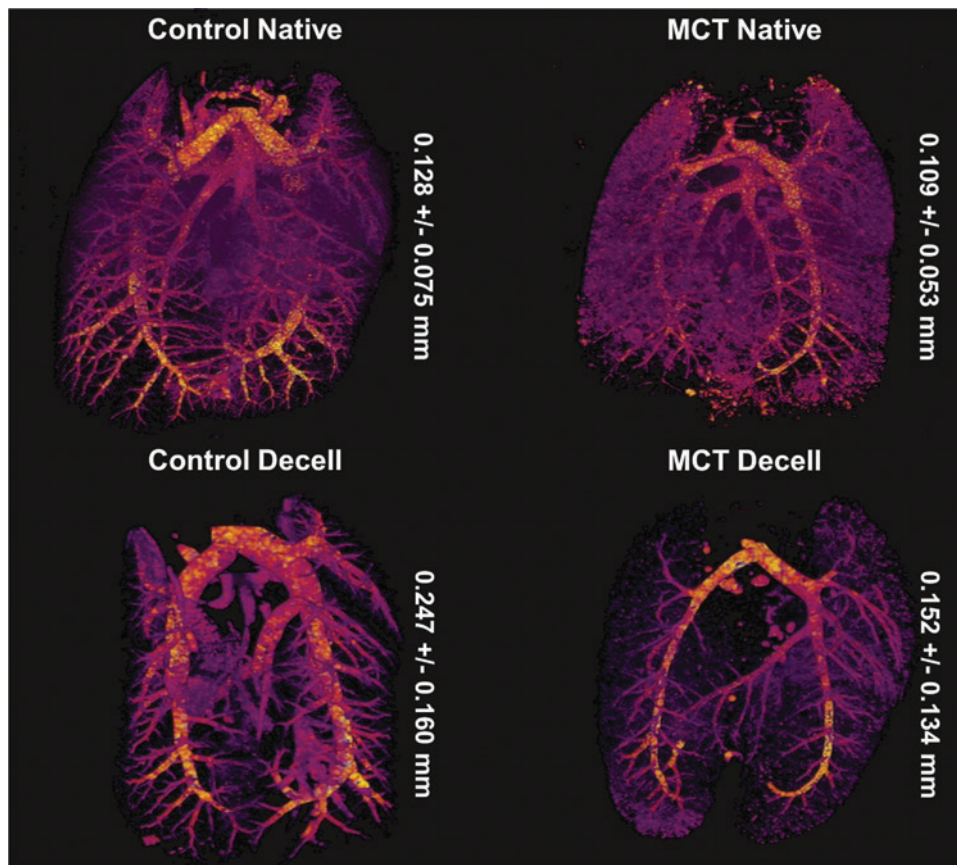

**SUPPLEMENTARY FIG. S3.** The vasculature of monocrotaline-induced pulmonary hypertension (MCT-PHT) lung scaffolds is intact, though more narrow, after decellularization compared to native controls. Red Microfil casting agent was perfused into the vasculature of representative native and decellularized control and MCT-PHT lungs via the pulmonary artery. A perfusion pump was used to instill casting agent at a uniform rate of 1 mL/min for 10 min and then 0.1 mL/min for 15 min in each of the lungs. The vascular casts were visualized by scanning with a SCANCO vivoCT-40 and showed that the vasculature of both control and MCT-PHT lungs is intact after decellularization, although MCT-PHT lungs have narrow blood vessels. ImageJ's BoneJ plugin for thickness determination was used to estimate the average diameter (shown alongside the three-dimensional renderings) of the vascular cast of a representative lung from each experimental group. The mean diameter of the vascular cast of MCT-PHT lungs is less than their control counterpart.
