# Supplementary material
Source: PubMed Central journal article supplement (PMC4011420)
Supplement: Supp_Fig4.pdf [file Supp_Fig4.pdf]

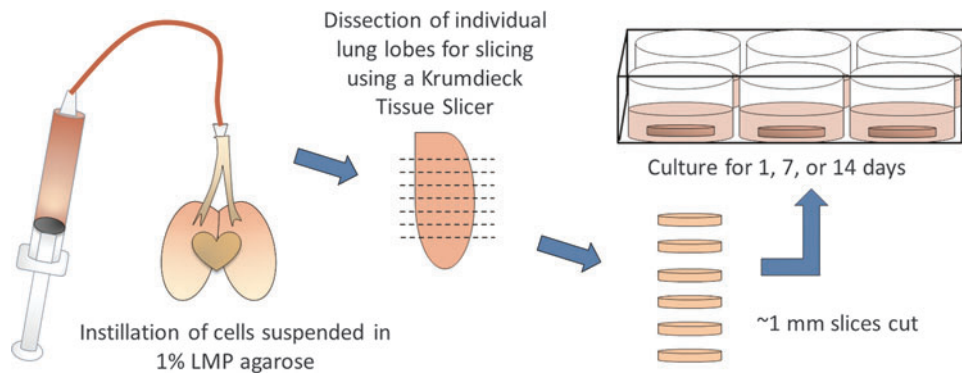

**SUPPLEMENTARY FIG. S4.** Slice culture method of cell seeding and culture. Lung scaffolds were instilled with cells in a 1:1 mixture of stem cell media and 1% low melting point (LMP) agarose. The agarose was solidified by incubation at 4°C for 30 min. Individual lung lobes were dissected and placed into the Krumdieck Tissue Slicer apparatus for slicing of ~1 mm thick slices. These slices were cultured in stem cell media in a six-well plate for up to 14 days.
