# Supplementary material
Source: PubMed Central journal article supplement (PMC4011420)
Supplement: Supp_Table1.pdf [file Supp_Table1.pdf]

SUPPLEMENTARY TABLE S1. ANTIBODIES USED FOR WESTERN BLOTTING  
AND FLUORESCENCE IMMUNOHISTOCHEMISTRY

| <i>Target</i>                        | <i>Host</i> | <i>Clonality</i> | <i>Isotype</i> | <i>Concentration</i> |            | <i>Company</i>    | <i>ID</i>  |
|--------------------------------------|-------------|------------------|----------------|----------------------|------------|-------------------|------------|
|                                      |             |                  |                | <i>WB</i>            | <i>IHC</i> |                   |            |
| Smooth muscle actin                  | Mouse       | Monoclonal       | IgG2           | 1:200                | 1:200      | Millipore         | MAB1522    |
| Collagen I                           | Rabbit      | Polyclonal       | IgG            | —                    | 1:100      | Millipore         | ABT123     |
| Collagen IV                          | Rabbit      | Polyclonal       | IgG            | —                    | 1:200      | Abcam             | Ab6586     |
| Collagen VI                          | Rabbit      | Polyclonal       | IgG            | —                    | 1:100      | Novus Biologicals | NB120-6588 |
| Elastin                              | Rabbit      | Polyclonal       | IgG            | —                    | 1:50       | Abcam             | Ab21610    |
| Fibronectin                          | Mouse       | Monoclonal       | IgG1           | 1:2500               | —          | Millipore         | MAB1926    |
| Laminin $\gamma$ 1                   | Mouse       | Monoclonal       | IgG2a          | 1:200                | 1:200      | R&D Systems       | MAB2139    |
| Vitronectin                          | Rabbit      | Monoclonal       | IgG            | —                    | 1:100      | Millipore         | 04-1108    |
| GAPDH                                | Rabbit      | Polyclonal       | IgG            | 1:2500               | —          | Abcam             | Ab9485     |
| Rabbit 1 antibody<br>isotype control | Rabbit      | Polyclonal       | IgG            | —                    | 1:100      | Invitrogen        | 08-6199    |
| Mouse IgG2a<br>isotype control       | Mouse       | Monoclonal       | IgG2a          | —                    | 1:100      | BD Biosciences    | 550339     |

WB, western blotting; IHC, immunohistochemistry; IgG, immunoglobulin G; GAPDH, glyceraldehyde 3-phosphate dehydrogenase.
